# Supplementary material for: Development and Application of Novel Caregiver Hygiene Behavior Measures Relating to Food Preparation, Handwashing, and Play Environments in Rural Kenya
Source: PubMed Central journal article supplement (PMC6163645; doi:10.3390/ijerph15091994), 2018-09-13
Supplement: ijerph-15-01994-s001.pdf [file ijerph-15-01994-s001.pdf]

*International Journal of Environmental Research and Public Health*

Supplementary Materials for:

**Development and Application of Novel Caregiver Hygiene Behavior Measures Relating to Food Preparation, Handwashing, and Play Environments in Rural Kenya**

**Breanna K. Wodnik<sup>1,\*</sup>, Matthew C. Freeman<sup>2</sup>, Anna S. Ellis<sup>2</sup>, Emily Awino Ogutu<sup>2</sup>, Amy Webb-Girard<sup>1</sup>, Bethany A. Caruso<sup>2</sup>**

<sup>1</sup> Hubert Department of Global Health, Rollins School of Public Health, Emory University, Atlanta, GA 30322, USA; bwodnik@emory.edu; awebb3@emory.edu

<sup>2</sup> Department of Environmental Health, Rollins School of Public Health, Emory University, Atlanta, GA 30322, USA; matthew.freeman@emory.edu; anna.s.ellis@emory.edu; emily.awino@yahoo.com; bethany.caruso@emory.edu

\* Correspondence: bwodnik@emory.edu

**Supplementary Table S1.** All original items related to hygienic food preparation and storage and frequency of responses (organized by COM-B component).

| Hygienic Food Preparation and Storage<br>n=270                                                                          |                                                             |    |    |    |     |                        |          |          |                             |
|-------------------------------------------------------------------------------------------------------------------------|-------------------------------------------------------------|----|----|----|-----|------------------------|----------|----------|-----------------------------|
| Item                                                                                                                    | Likert Scale<br>(1 = strongly disagree, 5 = strongly agree) |    |    |    |     | Descriptive Statistics |          |          | COM-B Component             |
|                                                                                                                         | 1                                                           | 2  | 3  | 4  | 5   | Mean                   | Kurtosis | Skewness |                             |
| <i>E.1.4 It is not necessary to reheat food for meals prepared early in the day.</i>                                    | 151                                                         | 15 | 7  | 28 | 69  | 2.44                   | 1.45     | 0.55     | Capability<br>Psychological |
| <i>E.1.5 It is okay to cut vegetables with the same knife just after I cut raw chicken or fish.</i>                     | 224                                                         | 9  | 2  | 13 | 22  | 1.52                   | 5.93     | 2.16     | Capability<br>Psychological |
| <i>E.1.8 I re-heat previously cooked food every time before feeding it to my family.</i>                                | 3                                                           | 3  | 1  | 15 | 248 | 4.86                   | 30.45    | -5.08    | Capability<br>Psychological |
| <i>E.1.56 I would feel confident to demonstrate preparation of food for children under 2 to others in my community.</i> | 7                                                           | 4  | 5  | 31 | 223 | 4.70                   | 13.94    | -3.29    | Capability<br>Physical      |
| <i>E.1.2 Most people in my community prepare food safely.</i>                                                           | 26                                                          | 13 | 50 | 42 | 139 | 3.94                   | 2.83     | -1.02    | Opportunity<br>Social       |
| <i>E.1.12 Most people in my community cover prepared food in between meals.</i>                                         | 16                                                          | 18 | 66 | 40 | 130 | 3.93                   | 2.63     | -0.83    | Opportunity<br>Social       |
| <i>E.1.13 Most people in my community reheat previously cooked food before feeding it to their families.</i>            | 15                                                          | 12 | 77 | 42 | 124 | 3.92                   | 2.73     | -0.79    | Opportunity<br>Social       |
| <i>E.1.1 Preparing food in a clean place is important.</i>                                                              | 0                                                           | 0  | 1  | 2  | 267 | 4.99                   | 133.23   | -11.05   | Motivation<br>Reflective    |
| <i>E.1.3 Reheating previously cooked food makes it less likely to make you sick.</i>                                    | 38                                                          | 10 | 3  | 26 | 193 | 4.21                   | 3.65     | -1.55    | Motivation<br>Reflective    |
| <i>E.1.6 It is beneficial to wash food before preparation.</i>                                                          | 5                                                           | 4  | 4  | 17 | 240 | 4.79                   | 19.00    | -3.97    | Motivation<br>Reflective    |
| <i>E.1.7 It is beneficial to store food in a covered container.</i>                                                     | 7                                                           | 3  | 2  | 19 | 239 | 4.78                   | 18.90    | -4.00    | Motivation<br>Reflective    |
| <i>E.1.9* It is important when cooking soup or other liquid foods to bring them to a full boil.</i>                     | 174                                                         | 3  | 4  | 13 | 55  | 2.08                   | 2.09     | 1.00     | Motivation<br>Reflective    |
| <i>E.1.10* It is safe to consume meat when the juices run red or pink.</i>                                              | 32                                                          | 4  | 3  | 15 | 195 | 4.35                   | 4.73     | -1.88    | Motivation<br>Reflective    |

|                                                                                                              |     |    |    |    |     |      |        |       |                          |
|--------------------------------------------------------------------------------------------------------------|-----|----|----|----|-----|------|--------|-------|--------------------------|
| <i>E.1.11 Thorough cooking of food makes it safe to eat.</i>                                                 | 1   | 0  | 1  | 5  | 263 | 4.96 | 118.56 | -9.99 | Motivation<br>Reflective |
| <i>E.1.14 Food that has NOT been covered is still safe to consume.</i>                                       | 154 | 29 | 14 | 26 | 47  | 2.20 | 2.02   | 0.85  | Motivation<br>Reflective |
| <i>E.1.15 Food that has not been covered between mealtimes can make my family sick.</i>                      | 24  | 3  | 8  | 33 | 202 | 4.43 | 6.24   | -2.15 | Motivation<br>Reflective |
| <i>E.1.16 If food has been sitting out for more than 4 hours, it can make my family sick if they eat it.</i> | 84  | 21 | 19 | 40 | 106 | 3.23 | 1.32   | -0.27 | Motivation<br>Reflective |
| <i>E.1.58 The reason I COOK foods thoroughly is because they taste better warm.</i>                          | 1   | 0  | 1  | 16 | 252 | 4.92 | 60.16  | -6.53 | Motivation<br>Reflective |
| <i>E.1.59 The reason I COOK foods thoroughly is to prevent sickness in my family.</i>                        | 0   | 1  | 2  | 10 | 257 | 4.94 | 44.29  | -5.98 | Motivation<br>Reflective |
| <i>E.1.60 The reason I REHEAT foods is because they taste better warm.</i>                                   | 2   | 2  | 1  | 10 | 255 | 4.90 | 44.73  | -6.20 | Motivation<br>Reflective |
| <i>E.1.61 The reason I REHEAT foods is to prevent sickness in my family.</i>                                 | 0   | 0  | 3  | 9  | 258 | 4.93 | 51.04  | -6.64 | Motivation<br>Reflective |

\*This question was added later; 249 participants responded

**Supplementary Table S2.** All original items related to the provision of a safe play environment and frequency of responses (organized by COM-B component).

| Provision of Safe Play Environment<br>n=270                                                                                     |                                                             |    |    |    |     |                   |          |          |                          |
|---------------------------------------------------------------------------------------------------------------------------------|-------------------------------------------------------------|----|----|----|-----|-------------------|----------|----------|--------------------------|
| Item                                                                                                                            | Likert Scale<br>(1 = strongly disagree, 5 = strongly agree) |    |    |    |     | Descriptive Stats |          |          | COM-B Component          |
|                                                                                                                                 | 1                                                           | 2  | 3  | 4  | 5   | Mean              | Kurtosis | Skewness |                          |
| <i>E.1.17 Most people in this community have animal feces (including chicken feces) present in their COMPOUND.</i>              | 23                                                          | 6  | 30 | 35 | 176 | 4.24              | 4.29     | -1.58    | Opportunity<br>Social    |
| <i>E.1.18 Most people in this community have animal feces (including chicken feces) present in their HOUSE.</i>                 | 59                                                          | 13 | 38 | 43 | 117 | 3.54              | 1.79     | -0.60    | Opportunity<br>Social    |
| <i>E.1.19 Most people in my community have a designated play area for their young children.</i>                                 | 104                                                         | 15 | 44 | 33 | 74  | 2.84              | 1.36     | 0.10     | Opportunity<br>Social    |
| <i>E.1.20 Most children in this community play in areas that are free from human feces.</i>                                     | 52                                                          | 15 | 31 | 34 | 138 | 3.71              | 1.97     | -0.77    | Opportunity<br>Social    |
| <i>E.1.21 Most children in this community play in areas that are free from animal feces (Including CHICKEN feces).</i>          | 73                                                          | 32 | 27 | 34 | 104 | 3.24              | 1.37     | -0.23    | Opportunity<br>Social    |
| <i>E.1.22 Most children in this community play in areas that are free from garbage or other wastes.</i>                         | 69                                                          | 29 | 24 | 35 | 113 | 3.35              | 1.42     | -0.35    | Opportunity<br>Social    |
| <i>E.1.26 I find it disgusting when animal feces (including CHICKEN feces) are present inside a house.</i>                      | 8                                                           | 5  | 3  | 15 | 239 | 4.75              | 15.32    | -3.61    | Opportunity<br>Social    |
| <i>E.1.27 I find it disgusting when animal feces (including CHICKEN feces) are present within a compound.</i>                   | 10                                                          | 4  | 2  | 10 | 244 | 4.76              | 15.47    | -3.69    | Opportunity<br>Social    |
| <i>E.1.23 It is possible for me to provide a play space to my child that is free of ANIMAL feces (including CHICKEN feces).</i> | 13                                                          | 16 | 9  | 29 | 203 | 4.46              | 5.93     | -2.05    | Motivation<br>Reflective |
| <i>E.1.24 It is possible for me to provide a play space to my child that is free of HUMAN feces.</i>                            | 11                                                          | 7  | 8  | 21 | 223 | 4.62              | 9.61     | -2.75    | Motivation<br>Reflective |

|                                                                                                                             |    |    |    |    |     |      |       |       |                          |
|-----------------------------------------------------------------------------------------------------------------------------|----|----|----|----|-----|------|-------|-------|--------------------------|
| <i>E.1.25 It is possible for me to provide a play space to my child that is free of garbage and other household wastes.</i> | 8  | 13 | 6  | 23 | 220 | 4.61 | 8.63  | -2.58 | Motivation<br>Reflective |
| <i>E.1.28 Chicken feces can make you sick.</i>                                                                              | 18 | 4  | 10 | 12 | 226 | 4.57 | 8.04  | -2.54 | Motivation<br>Reflective |
| <i>E.1.29 Dog feces can make you sick.</i>                                                                                  | 2  | 0  | 2  | 7  | 259 | 4.93 | 66.02 | -7.52 | Motivation<br>Reflective |
| <i>E.1.30 Cow / goat feces can make you sick.</i>                                                                           | 20 | 6  | 10 | 13 | 221 | 4.51 | 6.86  | -2.31 | Motivation<br>Reflective |

**Supplementary Table S3.** All original items related to handwashing at key times and frequency of responses (organized by COM-B component).

| Handwashing at Key times<br>n=270                                                                                |                                                             |    |    |    |     |                        |          |          |                         |
|------------------------------------------------------------------------------------------------------------------|-------------------------------------------------------------|----|----|----|-----|------------------------|----------|----------|-------------------------|
| Item                                                                                                             | Likert Scale<br>(1 = strongly disagree, 5 = strongly agree) |    |    |    |     | Descriptive Statistics |          |          | COM-B Component         |
|                                                                                                                  | 1                                                           | 2  | 3  | 4  | 5   | Mean                   | Kurtosis | Skewness |                         |
| <i>E.1.57 I would feel confident to demonstrate excellent hand washing techniques to others in my community.</i> | 9                                                           | 4  | 2  | 29 | 226 | 4.70                   | 14.00    | -3.37    | Capability<br>Physical  |
| <i>E.1.31 I always have water for handwashing.</i>                                                               | 6                                                           | 8  | 0  | 20 | 236 | 4.75                   | 15.24    | -3.58    | Opportunity<br>Physical |
| <i>E.1.32 It is possible for me to buy soap for handwashing</i>                                                  | 21                                                          | 10 | 1  | 34 | 204 | 4.44                   | 6.22     | -2.16    | Opportunity<br>Physical |
| <i>E.1.34 Sometimes I don't wash my hands because I don't have enough time.</i>                                  | 122                                                         | 8  | 1  | 33 | 106 | 2.97                   | 1.10     | -0.02    | Opportunity<br>Physical |
| <i>E.1.35 Most people in my community have soap.</i>                                                             | 49                                                          | 16 | 41 | 53 | 111 | 3.60                   | 1.99     | -0.67    | Opportunity<br>Social   |
| <i>E.1.36 Most people in my community use soap EVERY TIME they wash their hands.</i>                             | 55                                                          | 20 | 53 | 57 | 85  | 3.36                   | 1.79     | -0.43    | Opportunity<br>Social   |
| <i>E.1.37 Most people in my community wash their hands after defecating.</i>                                     | 50                                                          | 11 | 52 | 51 | 106 | 3.56                   | 2.01     | -0.64    | Opportunity<br>Social   |
| <i>E.1.38 Most people in my community wash their hands before preparing food.</i>                                | 34                                                          | 14 | 55 | 55 | 112 | 3.73                   | 2.42     | -0.79    | Opportunity<br>Social   |
| <i>E.1.39 Most people in my community wash their hands before feeding a young child.</i>                         | 28                                                          | 14 | 58 | 47 | 123 | 3.83                   | 2.57     | -0.86    | Opportunity<br>Social   |

|                                                                                                                                    |    |    |    |    |     |      |       |       |                          |
|------------------------------------------------------------------------------------------------------------------------------------|----|----|----|----|-----|------|-------|-------|--------------------------|
| <i>E.1.40 Most people in my community wash their hands before eating.</i>                                                          | 10 | 7  | 50 | 31 | 172 | 4.29 | 4.14  | -1.41 | Opportunity<br>Social    |
| <i>E.1.41 Most people in my community wash the hands of a CHILD under 2 years old before the child eats.</i>                       | 15 | 15 | 56 | 37 | 147 | 4.06 | 3.03  | -1.05 | Opportunity<br>Social    |
| <i>E.1.33 It is important for me to have soap available for handwashing.</i>                                                       | 1  | 1  | 1  | 27 | 240 | 4.87 | 32.81 | -4.70 | Motivation<br>Reflective |
| <i>E.1.42 Not washing my hands before preparing food can make my child sick.</i>                                                   | 10 | 21 | 13 | 23 | 203 | 4.44 | 5.22  | -1.89 | Motivation<br>Reflective |
| <i>E.1.43 Not washing my hands after touching the feces of my young child can cause me to become ill.</i>                          | 14 | 21 | 12 | 19 | 204 | 4.40 | 4.87  | -1.82 | Motivation<br>Reflective |
| <i>E.1.44 Washing your hands after you change your baby's nappies or diapers can prevent you and your child from becoming ill.</i> | 20 | 8  | 11 | 32 | 199 | 4.41 | 5.86  | -2.04 | Motivation<br>Reflective |

**Supplementary Table S4.** All original items related to responsive feeding practices and preparation of porridge of sufficient caloric density, and frequency of responses (organized by COM-B component).

| Responsive Feeding Practices<br>n=270                                                          |                                                             |    |    |    |     |                        |          |          |                             |
|------------------------------------------------------------------------------------------------|-------------------------------------------------------------|----|----|----|-----|------------------------|----------|----------|-----------------------------|
| Item                                                                                           | Likert Scale<br>(1 = strongly disagree, 5 = strongly agree) |    |    |    |     | Descriptive Statistics |          |          | COM-B Component             |
|                                                                                                | 1                                                           | 2  | 3  | 4  | 5   | Mean                   | Kurtosis | Skewness |                             |
| <i>E.1.45 It does not matter how thick or thin my child's porridge is.</i>                     | 90                                                          | 45 | 33 | 60 | 42  | 2.70                   | 1.54     | 0.20     | Capability<br>Psychological |
| <i>E.1.46 Thick porridge has more nutrients than thin porridge.</i>                            | 27                                                          | 26 | 12 | 64 | 141 | 3.99                   | 2.93     | -1.16    | Capability<br>Psychological |
| <i>E.1.47 Thick porridge will give my child stomach problems</i>                               | 99                                                          | 38 | 14 | 46 | 73  | 2.84                   | 1.31     | 0.14     | Capability<br>Psychological |
| <i>E.1.49 Infants show signs of hunger when they start crying.</i>                             | 40                                                          | 13 | 5  | 30 | 182 | 4.11                   | 3.16     | -1.37    | Capability<br>Psychological |
| <i>E.1.50 Infants show signs of hunger when they start reaching for their mothers' breast.</i> | 10                                                          | 4  | 0  | 15 | 241 | 4.75                   | 15.84    | -3.72    | Capability<br>Psychological |
| <i>E.1.51 Infants show signs of hunger when they put an object in their mouth.</i>             | 59                                                          | 5  | 3  | 17 | 186 | 3.99                   | 2.45     | -1.16    | Capability<br>Psychological |
| <i>E.1.52* I try to feed my child when he or she looks at other people who are eating.</i>     | 63                                                          | 7  | 2  | 8  | 90  | 3.32                   | 1.18     | -0.33    | Capability<br>Psychological |

|                                                                                             |    |    |    |    |     |      |      |       |                             |
|---------------------------------------------------------------------------------------------|----|----|----|----|-----|------|------|-------|-----------------------------|
| <i>E.1.53* I try to feed my child when he or she moves mouth and tongue as if eating.</i>   | 58 | 7  | 6  | 11 | 88  | 3.38 | 1.27 | -0.39 | Capability<br>Psychological |
| <i>E.1.54* I try to feed my child when he or she drools or spits.</i>                       | 85 | 16 | 2  | 16 | 51  | 2.60 | 1.31 | 0.40  | Capability<br>Psychological |
| <i>E.1.55* I try to feed my child when he or she puts other objects into her/his mouth.</i> | 83 | 8  | 3  | 16 | 60  | 2.78 | 1.15 | 0.20  | Capability<br>Psychological |
| <i>E.1.48 Thick porridge will give my child stomach problems.</i>                           | 59 | 36 | 26 | 43 | 106 | 3.37 | 1.51 | -0.37 | Motivation<br>Reflective    |

\*This question only asked of mothers with children under the age of 2; 170 participants total.
